# Supplementary material for: Humpback Whale Populations Share a Core Skin Bacterial Community: Towards a Health Index for Marine Mammals?
Source: PubMed Central journal article supplement (PMC3966734; doi:10.1371/journal.pone.0090785), 2014-03-26
Supplement: pone.0090785.s001.pdf [file pone.0090785.s001.pdf]

Table S1. Summary of humpback whale tissue samples and seawater analyzed in this study.

| Sample ID <sup>1</sup> | Sample type        | Collection method | Ocean          | Geographic Area | Habitat type <sup>2</sup> | Sex <sup>3</sup> | Age class <sup>4</sup> | Notes               |
|------------------------|--------------------|-------------------|----------------|-----------------|---------------------------|------------------|------------------------|---------------------|
| CCS2009-043            | Free-ranging whale | Biopsy            | North Atlantic | Gulf of Maine   | A                         | U                | C                      |                     |
| CCS2009-059            | Free-ranging whale | Biopsy            | North Atlantic | Gulf of Maine   | A                         | U                | C                      | Calf of CCS2009-058 |
| CCS2009-075            | Free-ranging whale | Biopsy            | North Atlantic | Gulf of Maine   | A                         | U                | C                      | Calf of CCS2009-076 |
| CCS2009-076            | Free-ranging whale | Biopsy            | North Atlantic | Gulf of Maine   | A                         | F                | A                      |                     |
| CCS2009-084            | Free-ranging whale | Biopsy            | North Atlantic | Gulf of Maine   | A                         | U                | A                      |                     |
| CCS2009-086            | Free-ranging whale | Biopsy            | North Atlantic | Gulf of Maine   | A                         | M                | A                      |                     |
| CCS2009-090            | Free-ranging whale | Biopsy            | North Atlantic | Gulf of Maine   | A                         | F                | C                      |                     |
| CCS2009-097            | Free-ranging whale | Biopsy            | North Atlantic | Gulf of Maine   | A                         | U                | U                      |                     |
| CCS2010-96             | Free-ranging whale | Biopsy            | North Atlantic | Gulf of Maine   | A                         | n/a              | n/a                    | Microscopy only     |
| CCS2010-97             | Free-ranging whale | Biopsy            | North Atlantic | Gulf of Maine   | A                         | n/a              | n/a                    | Microscopy only     |
| CCS2010-98             | Free-ranging whale | Biopsy            | North Atlantic | Gulf of Maine   | A                         | n/a              | n/a                    | Microscopy only     |
| CCS2010-99             | Free-ranging whale | Biopsy            | North Atlantic | Gulf of Maine   | A                         | n/a              | n/a                    | Microscopy only     |
| CCS2010-100            | Free-ranging whale | Biopsy            | North Atlantic | Gulf of Maine   | A                         | n/a              | n/a                    | Microscopy only     |
| CCS2010-101            | Free-ranging whale | Biopsy            | North Atlantic | Gulf of Maine   | A                         | n/a              | n/a                    | Microscopy only     |
| CCS2011-001            | Free-ranging whale | Biopsy            | North Atlantic | Gulf of Maine   | A                         | n/a              | n/a                    | Microscopy only     |
| CCS2009-044            | Free-ranging whale | Sloughed          | North Atlantic | Gulf of Maine   | A                         | U                | C                      | Same as CCS2009-043 |
| CCS2009-057            | Free-ranging whale | Sloughed          | North Atlantic | Gulf of Maine   | A                         | M                | J                      |                     |
| CCS2009-058            | Free-ranging whale | Sloughed          | North Atlantic | Gulf of Maine   | A                         | F                | A                      |                     |
| CCS2009-062            | Free-ranging whale | Sloughed          | North Atlantic | Gulf of Maine   | A                         | M                | C                      |                     |
| CCS2009-064 (a,b)      | Free-ranging whale | Sloughed          | North Atlantic | Gulf of Maine   | A                         | M                | U                      |                     |
| CCS2009-065            | Free-ranging whale | Sloughed          | North Atlantic | Gulf of Maine   | A                         | F                | J                      |                     |
| CCS2009-066            | Free-ranging whale | Sloughed          | North Atlantic | Gulf of Maine   | A                         | U                | J                      | Calf of CCS2009-058 |
| CCS2009-067            | Free-ranging whale | Sloughed          | North Atlantic | Gulf of Maine   | A                         | U                | U                      |                     |
| CCS2009-074            | Free-ranging whale | Sloughed          | North Atlantic | Gulf of Maine   | A                         | M                | A                      |                     |
| CCS2009-077            | Free-ranging whale | Sloughed          | North Atlantic | Gulf of Maine   | A                         | F                | J                      |                     |
| CCS2009-082            | Free-ranging whale | Sloughed          | North Atlantic | Gulf of Maine   | A                         | M                | J                      |                     |
| CCS2009-093            | Free-ranging whale | Sloughed          | North Atlantic | Gulf of Maine   | A                         | F                | J                      |                     |
| WH44                   | Free-ranging whale | Biopsy            | North Pacific  | Hawaii          | B                         | M                | A                      |                     |
| WH45 (a,b)             | Free-ranging whale | Biopsy            | North Pacific  | Hawaii          | B                         | U                | A                      |                     |
| WH46                   | Free-ranging whale | Biopsy            | North Pacific  | Hawaii          | B                         | U                | A                      |                     |
| WH47                   | Free-ranging whale | Biopsy            | North Pacific  | Hawaii          | B                         | M                | A                      |                     |
| WH49-b                 | Free-ranging whale | Biopsy            | North Pacific  | Hawaii          | B                         | M                | A                      |                     |

Table S1. Summary of humpback whale tissue samples and seawater analyzed in this study.

| Sample ID <sup>1</sup> | Sample type        | Collection method | Ocean         | Geographic Area  | Habitat type <sup>2</sup> | Sex <sup>3</sup> | Age class <sup>4</sup> | Notes                                                                                                                                              |
|------------------------|--------------------|-------------------|---------------|------------------|---------------------------|------------------|------------------------|----------------------------------------------------------------------------------------------------------------------------------------------------|
| WH50                   | Free-ranging whale | Biopsy            | North Pacific | Hawaii           | B                         | M                | A                      |                                                                                                                                                    |
| WH51                   | Free-ranging whale | Biopsy            | North Pacific | Hawaii           | B                         | M                | A                      |                                                                                                                                                    |
| WH52                   | Free-ranging whale | Biopsy            | North Pacific | Hawaii           | B                         | U                | C                      |                                                                                                                                                    |
| WH53                   | Free-ranging whale | Biopsy            | North Pacific | Hawaii           | B                         | F                | A                      |                                                                                                                                                    |
| WH55                   | Free-ranging whale | Biopsy            | North Pacific | Hawaii           | B                         | F                | A                      |                                                                                                                                                    |
| WH56                   | Free-ranging whale | Biopsy            | North Pacific | Hawaii           | B                         | M                | A                      |                                                                                                                                                    |
| WH57                   | Free-ranging whale | Biopsy            | North Pacific | Hawaii           | B                         | M                | A                      |                                                                                                                                                    |
| SEAK-1 (a,b)           | Free-ranging whale | Sloughed          | North Pacific | Southeast Alaska | A                         | U                | A                      |                                                                                                                                                    |
| SEAK-2 (a,b)           | Free-ranging whale | Sloughed          | North Pacific | Southeast Alaska | A                         | U                | A                      |                                                                                                                                                    |
| SEAK-3                 | Free-ranging whale | Sloughed          | North Pacific | Southeast Alaska | A                         | U                | A                      |                                                                                                                                                    |
| WH44M                  | Free-ranging whale | Sloughed          | North Pacific | Hawaii           | B                         | M                | A                      | Recovered from tag                                                                                                                                 |
| WH57BR (a,b)           | Free-ranging whale | Sloughed          | North Pacific | Hawaii           | B                         | M                | A                      | Recovered from tag, same as WH57                                                                                                                   |
| WH61 (a,b)             | Free-ranging whale | Sloughed          | North Pacific | Hawaii           | B                         | M                | A                      | Recovered from tag                                                                                                                                 |
| FBNMS-09-001           | Free-ranging whale | Biopsy            | South Pacific | American Samoa   | B                         | M                | A                      |                                                                                                                                                    |
| FBNMS-09-003           | Free-ranging whale | Biopsy            | South Pacific | American Samoa   | B                         | M                | A                      |                                                                                                                                                    |
| FBNMS-09-004           | Free-ranging whale | Biopsy            | South Pacific | American Samoa   | B                         | M                | A                      |                                                                                                                                                    |
| FBNMS-09-005           | Free-ranging whale | Biopsy            | South Pacific | American Samoa   | B                         | F                | A                      |                                                                                                                                                    |
| FBNMS-09-006           | Free-ranging whale | Sloughed          | South Pacific | American Samoa   | B                         | M                | A                      |                                                                                                                                                    |
| FBNMS-09-007           | Free-ranging whale | Sloughed          | South Pacific | American Samoa   | B                         | F                | A                      |                                                                                                                                                    |
| FBNMS-09-010           | Free-ranging whale | Biopsy            | South Pacific | American Samoa   | B                         | U                | A                      |                                                                                                                                                    |
| FBNMS-09-011           | Free-ranging whale | Sloughed          | South Pacific | American Samoa   | B                         | U                | A                      | Same as FBNMS-09-010                                                                                                                               |
| FBNMS-09-012           | Free-ranging whale | Biopsy            | South Pacific | American Samoa   | B                         | M                | A                      |                                                                                                                                                    |
| FBNMS-09-013           | Free-ranging whale | Biopsy            | South Pacific | American Samoa   | B                         | M                | A                      |                                                                                                                                                    |
| FBNMS-09-014           | Free-ranging whale | Biopsy            | South Pacific | American Samoa   | B                         | M                | A                      |                                                                                                                                                    |
| FBNMS-09-015           | Free-ranging whale | Sloughed          | South Pacific | American Samoa   | B                         | M                | A                      |                                                                                                                                                    |
| FBNMS-09-016           | Free-ranging whale | Biopsy            | South Pacific | American Samoa   | B                         | M                | A                      |                                                                                                                                                    |
| ENT1 (a,b)             | Entangled whale    | Sloughed          | North Pacific | Hawaii           | B                         | M                | A                      | Whale exhibited entanglement injuries and visual evidence of health impairment. Believed to have become entangled in Southeast Alaska at least two |

Table S1. Summary of humpback whale tissue samples and seawater analyzed in this study.

| Sample ID <sup>1</sup> | Sample type     | Collection method | Ocean          | Geographic Area | Habitat type <sup>2</sup> | Sex <sup>3</sup> | Age class <sup>4</sup> | Notes                                                                                                                                                 |
|------------------------|-----------------|-------------------|----------------|-----------------|---------------------------|------------------|------------------------|-------------------------------------------------------------------------------------------------------------------------------------------------------|
|                        |                 |                   |                |                 |                           |                  |                        | months earlier. Skin was recovered from gear in disentanglement.                                                                                      |
| ENT2                   | Entangled whale | Biopsy            | North Pacific  | Hawaii          | B                         | U                | A                      | Whale exhibited entanglement injuries and mild visual evidence of health impairment.                                                                  |
| SxMn1023               | Dead whale      | Necropsy sample   | North Atlantic | Gulf of Maine   | A                         | F                | J                      | Time since death is unknown, but assessed as “freshly dead” (Code 2) and death was thought to have been rapid (asphyxia).                             |
| IFAW10-188Mn (a,b)     | Dead whale      | Necropsy sample   | North Atlantic | Gulf of Maine   | A                         | M                | J                      | Samples were collected after the carcass stranded ashore, three days after first found dead at sea. The carcass was moderately decomposed (Code 3).   |
| Calf (a, b, c)         | Dead whale      | Necropsy sample   | North Pacific  | Hawaii          | B                         | F                | C                      | Died after stranding ashore alive. Samples were taken within an hour of death from below the head, dorsal portion of the head, and the peduncle area. |
| OWSI 2                 | Seawater        | Grab sample       | North Pacific  | Hawaii          | B                         | n/a              | n/a                    |                                                                                                                                                       |
| OWSI 4                 | Seawater        | Grab sample       | North Pacific  | Hawaii          | B                         | n/a              | n/a                    |                                                                                                                                                       |
| MSW 1                  | Seawater        | Grab sample       | North Pacific  | Hawaii          | B                         | n/a              | n/a                    |                                                                                                                                                       |
| MSW 3                  | Seawater        | Grab sample       | North Pacific  | Hawaii          | B                         | n/a              | n/a                    |                                                                                                                                                       |

<sup>1</sup>a,b and c designate replicate samples

<sup>2</sup>A = Temperate area, feeding habitat, catabolic metabolism assumed, B=Tropical area, breeding habitat, anabolic metabolism assumed

<sup>3</sup>M=male, F=female, U=unknown

<sup>4</sup>C=dependent calf, J=independent juvenile, A = Adult, U=unknown
