# Supplementary material for: Humpback Whale Populations Share a Core Skin Bacterial Community: Towards a Health Index for Marine Mammals?
Source: PubMed Central journal article supplement (PMC3966734; doi:10.1371/journal.pone.0090785), 2014-03-26
Supplement: pone.0090785.s002.pdf [file pone.0090785.s002.pdf]

Table S2. Results of SIMPER analysis describing the OTUs contributing to skin-bacterial community similarity within the geographical area.

| OTU           | Av. Abundance | Av. Similarity | Sim/SD | Contribution to similarity (%) |          | Taxonomy                                                           |
|---------------|---------------|----------------|--------|--------------------------------|----------|--------------------------------------------------------------------|
| Gulf of Maine |               |                |        |                                |          |                                                                    |
| 3             | 12.42         | 4.99           | 0.72   | 21.54                          |          | <i>Bacteroidetes, Tenacibaculum</i>                                |
| 2             | 11.69         | 4.57           | 0.81   | 19.73                          |          | <i>Gammaproteobacteria, Psychrobacter</i>                          |
| 12            | 3.62          | 1.57           | 0.83   | 6.8                            |          | <i>Bacteroidetes, Tenacibaculum</i>                                |
| 10*           | 5.12          | 1.45           | 0.51   | 6.27                           | GOM      | <i>Bacteroidetes, Tenacibaculum</i>                                |
| 29            | 3.45          | 1.13           | 0.65   | 4.87                           |          | <i>Bacteroidetes, Tenacibaculum</i>                                |
| 19            | 3.65          | 0.9            | 0.56   | 3.89                           | AK & GOM | <i>Gammaproteobacteria, Psychrobacter</i>                          |
| 4             | 5.32          | 0.9            | 0.36   | 3.87                           |          | <i>Bacteroidetes, Flavobacteriaceae, uncultured humpback group</i> |
| 28            | 3.07          | 0.89           | 0.48   | 3.84                           |          | <i>Gammaproteobacteria, Psychrobacter</i>                          |
| 9             | 3.96          | 0.76           | 0.36   | 3.29                           |          | <i>Gammaproteobacteria, Moraxellaceae</i>                          |
| 7             | 2.12          | 0.53           | 0.46   | 2.28                           |          | <i>Gammaproteobacteria, Psychrobacter</i>                          |
| 27            | 1.91          | 0.36           | 0.39   | 1.54                           |          | <i>Bacteroidetes, Tenacibaculum</i>                                |
| 5             | 2.85          | 0.35           | 0.55   | 1.5                            |          | <i>Gammaproteobacteria, Cardiobacteria</i>                         |
| 11            | 2.19          | 0.35           | 0.33   | 1.49                           |          | <i>Gammaproteobacteria, Psychrobacter</i>                          |
| 33            | 1.03          | 0.3            | 0.54   | 1.31                           | AK & GOM | <i>Gammaproteobacteria, Colwellia</i>                              |
| 17            | 1.72          | 0.29           | 0.49   | 1.26                           | AK & GOM | <i>Gammaproteobacteria, Psychrobacter</i>                          |
| 20            | 1.6           | 0.29           | 0.3    | 1.24                           | HI & GOM | <i>Alphaproteobacteria, Roseobacter clade AS-21</i>                |
| 51            | 0.89          | 0.28           | 0.6    | 1.21                           | AK & GOM | <i>Bacteroidetes, Tenacibaculum</i>                                |
| 1             | 1.22          | 0.24           | 0.41   | 1.02                           |          | <i>Bacteroidetes, Tenacibaculum</i>                                |
| Alaska        |               |                |        |                                |          |                                                                    |
| 21            | 17.17         | 7.18           | 0.61   | 28.51                          | AK       | <i>Gammaproteobacteria, Psychrobacter</i>                          |
| 8             | 26.73         | 6.99           | 0.5    | 27.75                          | AK       | <i>Bacteroidetes, Tenacibaculum</i>                                |
| 33            | 5.81          | 2.57           | 0.8    | 10.2                           | AK & GOM | <i>Gammaproteobacteria, Colwellia</i>                              |
| 3             | 5.11          | 1.61           | 0.53   | 6.4                            |          | <i>Bacteroidetes, Tenacibaculum</i>                                |
| 19            | 7.67          | 1.59           | 0.32   | 6.3                            | AK & GOM | <i>Gammaproteobacteria, Psychrobacter</i>                          |
| 28            | 3.96          | 0.87           | 0.34   | 3.47                           |          | <i>Gammaproteobacteria, Psychrobacter</i>                          |
| 17            | 1.27          | 0.32           | 0.41   | 1.26                           | AK & GOM | <i>Gammaproteobacteria, Psychrobacter</i>                          |
| 49            | 1.7           | 0.31           | 0.32   | 1.23                           | AK       | <i>Gammaproteobacteria, Colwellia</i>                              |
| 29            | 0.66          | 0.3            | 0.75   | 1.17                           | AK       | <i>Bacteroidetes, Tenacibaculum</i>                                |

Table S2. Results of SIMPER analysis describing the OTUs contributing to skin-bacterial community similarity within the geographical area.

| OTU            | Av. Abundance | Av. Similarity | Sim/SD | Contribution to similarity (%) |               | Taxonomy                                                                                                                                                      |
|----------------|---------------|----------------|--------|--------------------------------|---------------|---------------------------------------------------------------------------------------------------------------------------------------------------------------|
| 51             | 1.36          | 0.29           | 0.46   | 1.16                           | AK & GOM      | <i>Bacteroidetes, Tenacibaculum</i>                                                                                                                           |
| 110            | 1.16          | 0.28           | 0.33   | 1.11                           | AK            | <i>Gammaproteobacteria, Colwellia</i>                                                                                                                         |
| Hawaii         |               |                |        |                                |               |                                                                                                                                                               |
| 2              | 14.61         | 4.05           | 0.49   | 23.31                          |               | <i>Gammaproteobacteria, Psychrobacter</i>                                                                                                                     |
| 4              | 8.91          | 2.43           | 0.48   | 13.94                          |               | <i>Bacteroidetes, Flavobacteriaceae, uncultured humpback group</i>                                                                                            |
| 1              | 12.91         | 1.69           | 0.21   | 9.72                           |               | <i>Bacteroidetes, Tenacibaculum</i>                                                                                                                           |
| 7              | 5.03          | 1.03           | 0.33   | 5.91                           |               | <i>Gammaproteobacteria, Psychrobacter</i>                                                                                                                     |
| 9              | 4.11          | 0.99           | 0.4    | 5.68                           |               | <i>Gammaproteobacteria, Moraxellaceae</i>                                                                                                                     |
| 15             | 3.46          | 0.91           | 0.44   | 5.25                           | HI & Am Samoa | <i>Betaproteobacteria, Aquabacterium</i>                                                                                                                      |
| 27             | 1.87          | 0.72           | 0.75   | 4.12                           |               | <i>Bacteroidetes, Tenacibaculum</i>                                                                                                                           |
| 5              | 1.44          | 0.43           | 0.51   | 2.48                           | HI & Am Samoa | <i>Gammaproteobacteria, Cardiobacteria</i>                                                                                                                    |
| 20             | 1.59          | 0.41           | 0.49   | 2.35                           | HI & GOM      | <i>Alphaproteobacteria, Roseobacter clade AS-21</i>                                                                                                           |
| 39             | 1.23          | 0.38           | 0.47   | 2.16                           | HI & Am Samoa | <i>Gammaproteobacteria, Escherichia</i>                                                                                                                       |
| 11             | 0.91          | 0.35           | 0.71   | 2                              |               | <i>Gammaproteobacteria, Psychrobacter</i>                                                                                                                     |
| 35             | 1.67          | 0.32           | 0.28   | 1.85                           | HI            | <i>Alphaproteobacteria, Novosphingobium</i> (aromatic hydrocarbon degrader, glycosphingolipids (sphingans) - useful for colonization of eukaryotic organisms) |
| 12             | 3.38          | 0.31           | 0.45   | 1.77                           |               | <i>Bacteroidetes, Tenacibaculum</i>                                                                                                                           |
| 14             | 4.75          | 0.31           | 0.18   | 1.76                           | HI            | <i>Gammaproteobacteria, Psychrobacter</i>                                                                                                                     |
| American Samoa |               |                |        |                                |               |                                                                                                                                                               |
| 27             | 9.09          | 3.59           | 0.65   | 18.58                          |               | <i>Bacteroidetes, Tenacibaculum</i>                                                                                                                           |
| 2              | 12.57         | 3.48           | 0.45   | 17.99                          |               | <i>Gammaproteobacteria, Psychrobacter</i>                                                                                                                     |
| 3              | 7.68          | 1.6            | 0.38   | 8.25                           |               | <i>Bacteroidetes, Tenacibaculum</i>                                                                                                                           |
| 12             | 7.17          | 1.45           | 0.54   | 7.51                           |               | <i>Bacteroidetes, Tenacibaculum</i>                                                                                                                           |
| 11             | 6.24          | 1.13           | 0.54   | 5.82                           |               | <i>Gammaproteobacteria, Psychrobacter</i>                                                                                                                     |
| 1              | 6.68          | 0.92           | 0.39   | 4.73                           |               | <i>Bacteroidetes, Tenacibaculum</i>                                                                                                                           |

Table S2. Results of SIMPER analysis describing the OTUs contributing to skin-bacterial community similarity within the geographical area.

| OTU | Av. Abundance | Av. Similarity | Sim/SD | Contribution to similarity (%) |               | Taxonomy                                                           |
|-----|---------------|----------------|--------|--------------------------------|---------------|--------------------------------------------------------------------|
| 5   | 1.77          | 0.71           | 0.73   | 3.66                           | HI & Am Samoa | <i>Gammaproteobacteria, Cardiobacteria</i>                         |
| 9   | 2.52          | 0.71           | 0.51   | 3.66                           |               | <i>Gammaproteobacteria, Pseudomonadales, Moraxellaceae</i>         |
| 7   | 2.73          | 0.7            | 0.4    | 3.6                            |               | <i>Gammaproteobacteria, Psychrobacter</i>                          |
| 15  | 2.46          | 0.6            | 0.58   | 3.08                           | HI & Am Samoa | <i>Betaproteobacteria, Burkholderiales, Aquabacterium</i>          |
| 37  | 3.13          | 0.46           | 0.23   | 2.37                           | Am Samoa      | <i>Bacteroidetes, Flavobacteriaceae</i>                            |
| 50  | 1.68          | 0.42           | 0.37   | 2.17                           | Am Samoa      | <i>Bacteroidetes, Flavobacteriaceae, uncultured humpback group</i> |
| 22  | 3.95          | 0.39           | 0.22   | 2                              | Am Samoa      | <i>Proteobacteria, Incertae Sedis (humpback-specific)</i>          |
| 41  | 2.66          | 0.36           | 0.22   | 1.84                           | Am Samoa      | <i>Bacteroidetes, Flavobacteriaceae</i>                            |
| 39  | 0.65          | 0.21           | 0.53   | 1.07                           | HI & Am Samoa | <i>Gammaproteobacteria, Escherichia-Shigella</i>                   |
| 38  | 1.37          | 0.2            | 0.33   | 1.02                           | Am Samoa      | <i>Gammaproteobacteria, Colwellia</i>                              |
